# Supplementary material for: Metabolic engineering of cyanobacteria for ethanol production
Source: Royal Society of Chemistry journal article supplement (doi:10.1039/b811937f), 2009-01-01

## Appendix I: Primers Used for Sequencing

For sequencing ethanol cassette (pMota, pMota2):

5' – CATCTCCATTgTCCCTgAAAATCAgTT – 3'

5' – ATgAgTTATACTgTCggTACCTATT – 3'

5' – AATAggTACCgACAgTATAACTCAT – 3'

5' – AAAAgACgATgAAAgAAgCCgATgC – 3'

5' – gCATCggCTTCTTTCATCgTCTTTT – 3'

5' – ATggAAgTgTTCAACggTAACg – 3'

5' – CgTTACCgTTgAACACTTCCAT – 3'

5' – ATTTgAAgCTTATTCTTCAACg – 3'

5' – CgTTgAAgAATAAgCTTCAAAT – 3'

5' – gATTATTCAgTTggCATTACACCA – 3'

For sequencing omrA gene (pMota2-omrA):

5' – ATgTCAgAAAgAACgCTTAgtATgCgT – 3'

5' – TTTTgAAAATAATCAATTTATCCCAA – 3'

5' – TCAAATTCAAATTTgTTTAAATTCg – 3'

5' – CgAATTTAAACAAATTTTgAATTT – 3'

5' – CAATATTgAAAATATTTCACTCAACT – 3'

5' – TATCCAATTTTTTTggCATgTTgT – 3'

5' – TACTTTATCgAACATggTgAAgTgA – 3'

5' – ATATTATgCggCCgCCTATTATTCTAATTTTgTTAgTTTTTgTTTTTT – 3'

## Appendix II: Plasmid Sequences

### pMota:

```
1  TCTTCCGCTTCCTCGCTCACTGACTCGCTGCGCTCGGTTCGGCTGCGGCGAGCGGTA
   61  TCAGCTCACTCAAAGGCGGTAATACGGTTATCCACAGAATCAGGGGATAACGCAGGAAAG
  121  AACATGTGAGCAAAAGGCCAGCAAAAGGCCAGGAACCGTAAAAAGCCGCGTTGCTGGCG
  181  TTTTTCATAGGCTCCGCCCCCTGACGAGCATCAGAAAAATCGACGCTCAAGTCAGAGG
  241  TGGCGAAACCCGACAGGACTATAAAGATACCAGGCGTTTCCCCCTGGAAGCTCCCTCGTG
  301  CGCTCTCCTGTTCCGACCCTGCCGCTTACCGGATACCTGTCCGCTTTCTCCCTTCGGGA
  361  AGCGTGGCGCTTCTCATAGCTCACGCTGTAGGTATCTCAGTTCGGTGTAGGTCGTTTCGC
  421  TCCAAGCTGGGCTGTGTGCACGAACCCCCGTTAGCCCGACCGCTGCGCCTTATCCGGT
  481  AACTATCGTCTTGAGTCCAACCCGGTAAGACACGACTTATCGCCACTGGCAGCAGCCACT
  541  GGTAACAGGATTAGCAGAGCGAGGTATGTAGGCGGTGCTACAGAGTCTTGAAGTGGTGG
  601  CCTAACTACGGCTACACTAGAAGAACAGTATTTGGTATCTGCGCTCTGCTGAAGCCAGTT
  661  ACCTTCGGAAAAAGAGTTGGTAGCTCTTGATCCGGCAAACAAACCACCGCTGGTAGCGGT
  721  GGTTTTTTTGTTTCAAGCAGCAGATTACGCGCAGAAAAAAGGATCTCAAGAAGATCCT
  781  TTGATCTTTTCTACGGGTCTGACGCTCAGTGGAAAGAACTCACGTTAAGGGATTTTG
  841  GTCATGAGATTATCAAAAAGGATCTTACCTAGATCCTTTTAAATTAATAATGAAGTTTT
  901  AAATCAATCTAAAGTATATATGAGTAAACTTGGTCTGACAGTTACCAATGCTTAATCAGT
  961  GAGGCACCTATCTCAGCGATCTGTCTATTTTCGTTTCATCCATAGTTGCCTGACTCCCCGTC
 1021  GTGTAGATAACTACGATACGGGAGGGCTTACCATCTGGCCCAGTGTGCAATGATACCG
 1081  CGAGACCCACGCTCACCGGCTCCAGATTTATCAGCAATAAACCAGCCAGCCGGAAGGGCC
 1141  GAGCGCAGAAGTGGTCTTCAACTTTATCCGCTCCATCCAGTCTATTAATTGTTGCCGG
 1201  GAAGCTAGAGTAAGTAGTTCCGCGGTTAATAGTTTGCAGCAACGTTGTTGCCATTGCTACA
 1261  GGCATCGTGGTGTACGCTCGTCGTTTGGTATGGCTTCATTAGCTCCGGTTCCCAACGA
 1321  TCAAGGCGAGTTACATGATCCCCATGTTGTGCAAAAAGCGGTTAGCTCCTTCGTCCTT
 1381  CCGATCGTTGTGAGAAAGTAAAGTTGGCCGAGTGTATCACTCATGGTTATGGCAGCACTG
 1441  CATAATTCTCTTACTGTATGCCATCCGTAAGATGCTTTTCTGTGACTGGTGAGTACTCA
 1501  ACCAAGTCATTCTGAGAATAGTGTATGCGGCGACCGAGTTGCTCTTGCCCGCGTCAATA
 1561  CGGGATAATACCGGCCACATAGCAGAACTTTAAAAGTGTCTATCATTGGAAAACGTTCT
 1621  TCGGGGCGAAAACCTCAAGGATCTTACCGCTGTTGAGATCCAGTTCGATGTAACCCACT
 1681  CGTGCACCCAACCTGATCTTACGATCTTTTACTTTTACCAGCGTTTCTGGGTGAGCAAAA
 1741  ACAGGAAGGCAAAATGCCGCAAAAAGGGAATAAGGGCGACACGAAATGTTGAATACTC
 1801  ATACTCTTCTTTTCAATATTATGAAGCATTATCAGGGTTATTGTCTCATGAGCGGA
 1861  TACATATTTGAATGTATTTAGAAAAATAAACAAATAGGGGTTCCGCGCACATTTCCCCGA
 1921  AAAGTGCCACCTGACGTCTAAGAAACCATTATTATCATGACATTAACCTATAAAAAATAGG
 1981  CGTATCACGAGGCCCTTTCGTCTCGCGGTTTCGGTGATGACGGTGAAAACTCTGACAC
 2041  ATGCAGCTCCCGGAGACGGTCACAGCTTGTCTGTAAGCGGATGCCGGGAGCAGACAAGCC
 2101  CGTCAGGGCGCGTCAGCGGGTGTGGCGGGTGTCCGGGCTGGCTTAACTATGCGGCATCA
 2161  GAGCAGATTGTACTGAGAGTGCACCATAAAATTTGTAACGTTAATATTTTGTAAAATTC
 2221  GCGTTAAATTTTTGTTAAATCAGCTCATTTTTTAACCAATAGGCCGAAATCGGCAAAATC
 2281  CCTATAAAATCAAAAGAAATAGCCCGAGATAGGGTTGAGTGTGTTCCAGTTTGAACAAG
 2341  AGTCCACTATTAAGAACGTGGACTCCAACGTCAAAGGGCGAAAAACCGTCTATCAGGGC
```

2401 GATGGCCCACTACGTGAACCATCACCCAAATCAAGTTTTTTGGGGTCGAGGTGCCGTAAA  
2461 GCACTAAATCGGAACCTAAAGGGAGCCCCGATTTAGAGCTTGACGGGGAAAGCCGGCG  
2521 AACGTGGCGAGAAAAGGAAGGGAAGAAAGCGAAAGGAGCGGGCGCTAGGGCGCTGGCAAGT  
2581 GTAGCGGTACACGCTGCGCGTAACCACACACCCGCCGCTTAATGCGCCGCTACAGGGC  
2641 GCGTACTATGGTTGCTTTGACGTATGCGGTGTGAAATACCGCACAGATGCGTAAGGAGAA  
2701 AATACCGCATCAGGCGCCATTTCGCCATTTCAGGCTGCGCAACTGTTGGGAAGGGCGATCGG  
2761 TCGGGCCTCTTCGCTATTACGCCAGCTGGCGAAAGGGGGATGTGCTGCAAGGCGATTAA  
2821 GTTGGGTAACGCCAGGGTTTTCCAGTACAGCGTTGTAAAACGACGGCCAGTGCCAAGC  
2881 TTAAGGTGCACGGCCACGTGGCCACTAGTACTTCTCGAGCTCTGTACATGTCCGCGGTC  
2941 GCGACGTACGCGTATCGATGGCGCCAG

>500 base pair homologous upstream region, containing the psbAII promoter

CTGCAGAGCGTTCCAGTGGATATTTGCTGGGGG  
3001 TTAATGAAACATTGTGGCGGAACCCAGGGACAATGTGACCAAAAAATTCAGGGATATCAA  
3061 TAAGTATTAGGTATATGGATCATAATTGTATGCCCGACTATTGCTTAAACTGACTGACCA  
3121 CTGACCTTAAGAGTAATGGCGTGCAAGGCCAGTGATCAATTTTCATTATTTTTCATTATT  
3181 TCATCTCCATTGTCCCTGAAAATCAGTTGTGTGCGCCCTCTACACAGCCAGAACTATGG  
3241 TAAAGGCGCACGAAAAACCGCCAGGTAAACTCTTCTCAACCCCAAAAACGCCCTCTGTTT  
3301 ACCCATGGAAAAACGACAATTACAAGAAAGTAAACTTATGTTCATCTATAAGCTTCGTG  
3361 TATATTAACCTCCTGTTACAAAGCTTTACAAAACCTCTCATTAACTCTTTAGACTAAGTTT  
3421 AGTCAGTTCCAATCTGAACATCGACAAATACATAAGGAATTATAACCAT

>Start of the pdc/adh genetic cassette, the pdc gene, note the CATATG NdeI  
>restriction site that allows for cloning genes into the promoter structure with  
ease

ATGAGTTATAC  
3481 TGTCGGTACCTATTTAGCGGAGCGGCTTGTCCAGATTGGTCTCAAGCATCACTTCGCAGT  
3541 CGCGGGCGACTACAACCTCGTCTTCTTGACAACCTGCTTTTGAACAAAAACATGGAGCA  
3601 GGTTTATTGCTGTAAACGAACCTGAACTGCGGTTTTCAGTGCAGAAGGTTATGCTCGTGCCAA  
3661 AGGCGCAGCAGCAGCCGTCGTTACCTACAGCGTCGGTGGCGCTTTCCGCATTTGATGCTAT  
3721 CGGTGGCGCCTATGCAGAAAACCTTCCGGTTATCCTGATCTCCGGTGCTCCGAACAACAA  
3781 TGATCACGCTGCTGGTACAGTGTTCATCACGCTCTTGCCAAAACCGACTATCACTATCA  
3841 GTTGGAAATGGCCAAGAACATCACGGCCGAGCTGAAGCGATTTACACCCAGAAGAAGC  
3901 TCCGGCTAAAATCGATCACGTGATTA AAAACTGCTCTTCGTGAGAAGAAGCCGGTTTATCT  
3961 CGAAAATCGCTTGCAACATTGCTTCCATGCCCTGCGCCGCTCCTGGACCGGCAAGCGCATT  
4021 GTTCAATGACGAAGCCAGCGACGAAGCTTCTTTGAATGCAGCGGTTGAAGAAACCTGAA  
4081 ATTCATCGCCAACCGCGACAAAGTTGCCGTCTCGTCGGCAGCAAGCTGCGCGCAGCTGG  
4141 TGCTGAAGAAGCTGCTGTCAAATTTGCTGATGCTCTCGGTGGCGCAGTTGCTACCATGGC  
4201 TGCTGCAAAAAGCTTCTTCCAGAAGAAAACCCGCATTACATCGGTACCTCATGGGGTGA  
4261 AGTCAGCTATCCGGGCGTTGAAAAGACGATGAAAGAAGCCGATGCGGTTATCGCTCTGGC  
4321 TCCTGTCTTCAACGACTACTCCACCCTGTTGGACGGATATTCCTGATCCTAAGAACT

4381 GGTTCCTCGCTGAACCCGGTTCCTGTCGTCGTTAACGGCGTTCGCTTCCCCAGCGTTCATCT  
4441 GAAAGACTATCTGACCCGTTTGGCTCAGAAAGTTTCCAAGAAAACCGGTGCTTTGGACTT  
4501 CTTCAAATCCCTCAATGCAGGTGAAGTGAAGAAAGCCGCTCCGGCTGATCCGAGTGTCC  
4561 GTTGGTCAACGCAGAAATCGCCCGTCAGGTGCAAGCTCTTCTGACCCCGAACACGACGGT  
4621 TATTGCTGAAACCCGGTGAAGTCTTGGTTCAATGCTCAGCGCATGAAGTCCCGAACGGTGC  
4681 TCGCGTTGAATATGAAATGCAGTGGGGTACATCGGTTGGTCCGTTCTGCGCCCTTCGG  
4741 TTATGCCGTCGGTGTCCGGAACGTCGCAACATCCTCATGGTTGGTATGGTTCCTTCCA  
4801 GCTGACGGCTCAGGAAAGTGCCTCAGATGGTTCGCTGAAACTGCCGGTTATCATCTTCTT  
4861 GATCAATAACTATGGTTACACCATCGAAGTTATGATCCATGATGGTCCGTACAACAACAT  
4921 CAAGAACTGGGATTATGCCGGTCTGATGGAAGTGTCAACGGTAACGGTGGTTATGACAG  
4981 CGGTGCTGGTAAAGGCCTGAAGGCTAAAACCGGTGGCGAACTGGCAGAAGCTATCAAGGT  
5041 TGCTCTGGCAAACACCGACGGCCCAACCCGTGATCGAATGCTTCATCGGTGCTGAAGACTG  
5101 CACTGAAGAATTGGTCAAATGGGGTAAAGCGCGTTGCTGCGCCCAACAGCCGTAAGCCTGT  
5161 TAACAAGCTCCTCTAGTTTTTGGGGATCAATTGAGCTCGGTACCCAAACTAGTATGTAG  
5221 GGTGAGGTTATAGCT

>Start of the adh gene

ATGGCTTCTTCAACTTTTTATATTCCTTTCGTCAACGAAATGGGC  
5281 GAAGGTTTCGCTTAAAAAGCAATCAAGGATCTTAACGGCAGCGGCTTAAAAATGCGCTG  
5341 ATCGTTTCTGATGCTTTCATGAACAAATCCGGTGTGTGAAGCAGGTTGCTGACCTGTTG  
5401 AAAGCACAGGGTATTAATTCTGCTGTTTATGATGGCGTTATGCCGAACCCGACTGTTACC  
5461 GCAGTTCTGGAAGGCCTTAAGATCCTGAAGGATAACAATTGAGACTTCGTTCATCTCCCTC  
5521 GGTGGTGGTTCTCCCATGACTGCGCCAAAGCCATCGCTCTGGTCGCAACCAATGGTGGT  
5581 GAAGTCAAAGACTACGAAGGTATCGACAAATCTAAGAAACCTGCCCTGCCTTTGATGTCA  
5641 ATCAACACGACGGCTGGTACGGCTTCTGAAATGACGCGTTTCTGCATCATCACTGATGAA  
5701 GTCCTCACGTTAAGATGGCCATTGTTGACCGTCACGTTACCCCGATGGTTTCCGTCAAC  
5761 GATCCTCTGTTGATGGTTGGTATGCCAAAAGGCCTGACCGCCGCCACCGGTATGGATGCT  
5821 CTGACCCACGCATTGAAGCTTATCTTCAACGGCAGCTACTCCGATCACCGATGCTTGC  
5881 GCCTTGAAGGCTGCGTCCATGATCGCTAAGAATCTGAAGACCGCTTGCAGAACCGTAAG  
5941 GATATGCCAGCTCGTGAAGCTATGGCTTATGCCCAATTCTCGCTGGTATGGCCTTCAAC  
6001 AACGCTTCGCTTGGTTATGTCCATGCTATGGCTCACCAGTTGGGCGGCTACTACAACCTG  
6061 CCGCATGGTGTCTGCAACGCTGTTCTGCTTCCGCATGTTCTGGCTTATAACGCCTCTGTC  
6121 GTTGTGGTTCGCTGAAAGACGTTGGTGTGCTATGGGTCTCGATATCGCCAATCTCGGT  
6181 GATAAAGAAGGCGCAGAAGCCACCATTGAGGCTGTTGCGGATCTGGCTGCTTCCATTGGT  
6241 ATTCCAGCAAATCTGACCGAGCTGGGTGCTAAGAAAGAAGATGTGCCGCTTCTTGCTGAC  
6301 CACGCTCTGAAAGATGCTTGTGCTCTGACCAACCCGCTCAGGGTATCAGAAAGAAGTT  
6361 GAAGAACTCTTCTGAGCGCTTTCTAATTTCAAACAGGAAAACGGTTTTTCCGTCTGTC  
6421 TTGATTTTCAAGCAAACAATGCCTCCGATTTCTAATCGGAGGCATTTGTTTTTGTATT  
6481 GCAAAAAAATAAATATTGTTACAAATTTTTACAGGCTATTAAGCCTACCGTCATAAATA  
6541 ATTTGCCATTTGGGGATCC

TAATTCCTTGGTGTAAATGCCAACTGAATAATCTGCAAATTG

6601 CACTCTCCTTCAATGGGGGTGCTTTTTGCTTACTGAGTAATCTTCTGATTGCTGATCT

6661 TGATTGCCATCGATCGCCGGGGAGTCCGGGGCAGTTACCATTAGAGAGTCTAGAGAATTA  
6721 ATCCATCTTCGATAGAGGAATTATGGGGGAAGAACCTGTGCCGGCGGATAAAGCATTAGG  
6781 CAAGAAATTCAGAAAAAAAATGCCTCCTGGAGCATTGAAGAAAGCGAAGCTCTGTACCG  
6841 GGTGAGGCCTGGGGGGCACCTTATTTTGCCATTAATGCCGCTGGTAAACATAACCGTCTC  
6901 TCCCAACGGCGATCGGGGCGGTTTCGTTAGATTTGTTGGAAGTGGTGAAGCCCTGCGGCA  
6961 AAGAAAGCTCGGCTTACCCCTATTAATTCGTTTTTCCGATATTTTGGCCGATCGCCTAGA  
7021 GCGATTGAATAGTTGTTTTGCCAAGGCGATCGAATTCGTAATCATGGTCATAGCTGTTTC  
7081 CTGTGTGAAATTGTTATCCGCTCACAATTCACACAACATACGAGCCGGAAGCATAAAGT  
7141 GTAAAGCCTGGGGTGCCTAATGAGTGAGCTAACTCACATTAATTGCGTTGCGCTCACTGC  
7201 CCGCTTTCAGTCCGGAAACCTGTCGTGCCAGCTGCATTAATGAATCGGCCAACGCGCGG  
7261 GGAGAGGCGGTTTTCGCTATTGGGCGC

Appendix III. Creation of pMota via the removal of the NdeI/BamHI fragment from pPSBAlIKS and replacement with the pdc/adh cassette from pLOI295.

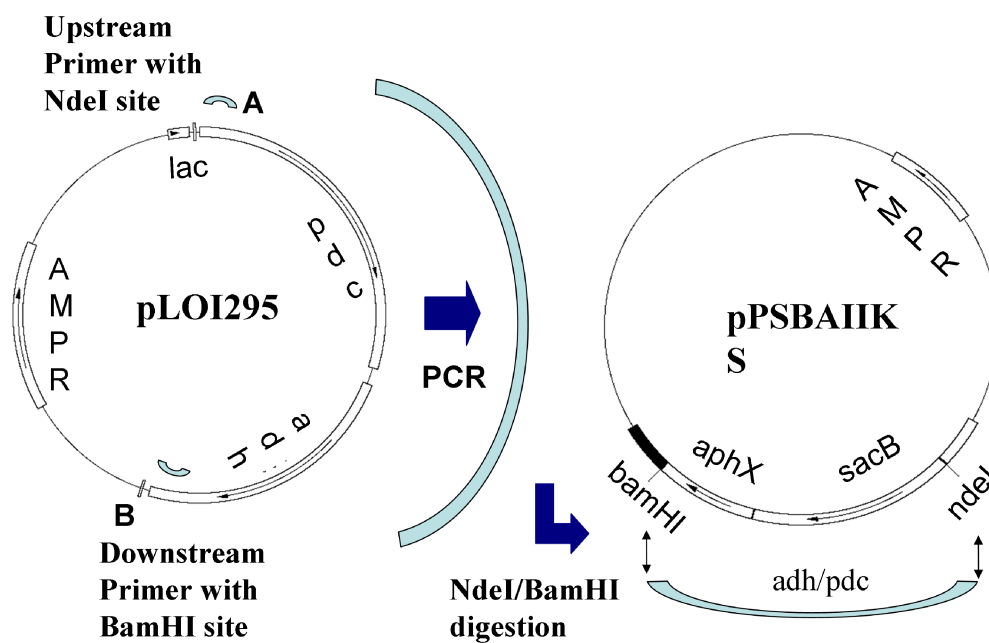

Supplement: b811937f.pdf [file b811937f.pdf]
